# Supplementary material for: Crystal architecture and physicochemical properties of felodipine solvates
Source: Royal Society of Chemistry journal article supplement (doi:10.1039/c3ce40715b), 2013-01-01
Supplement: c3ce40715b.pdf [file c3ce40715b.pdf]

# **Crystal architecture and physicochemical properties of felodipine solvates**

Artem O. Surov, Katarzyna A. Solanko, Andrew D. Bond,  
Annette Bauer-Brandl, and German L. Perlovich

## **Supporting Information**

## S1. CSD Analysis for felodipine-like molecules

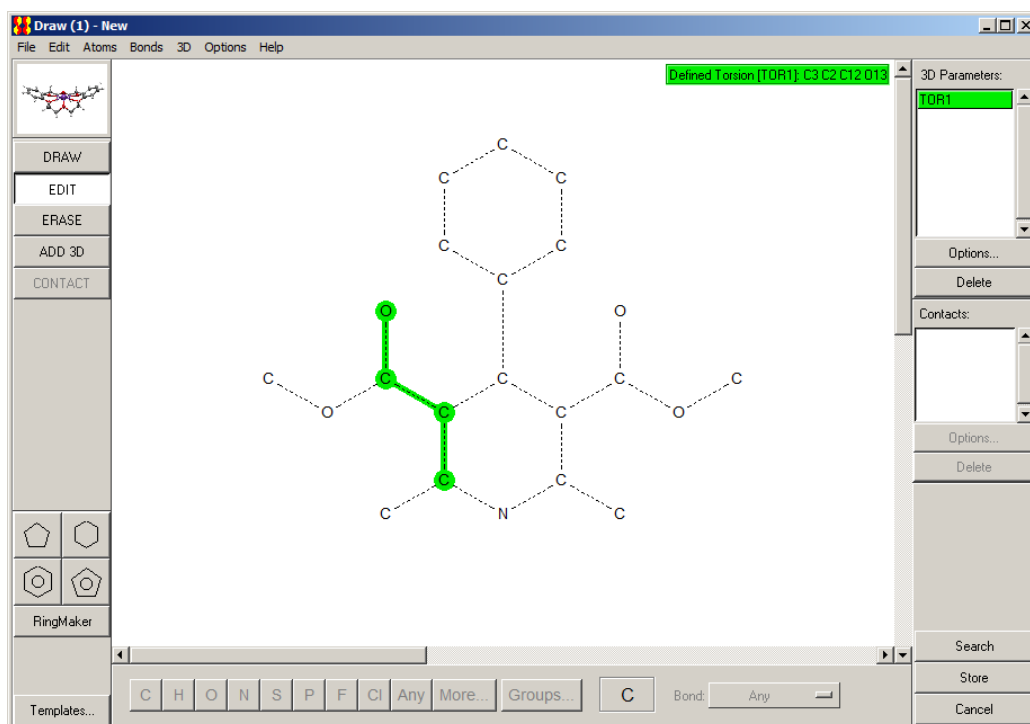

**Figure S1.** Molecular fragment used in a Conquest search of the CSD

CSD Version 5.34 (Nov 2012), best representative set according to *R*-factor (379018 entries)

Search constraints: 3-D coordinates determined, only organics

Result: 155 hits

Restrict to Me and Et groups on the ester, and methyl groups either side of N: 83 hits

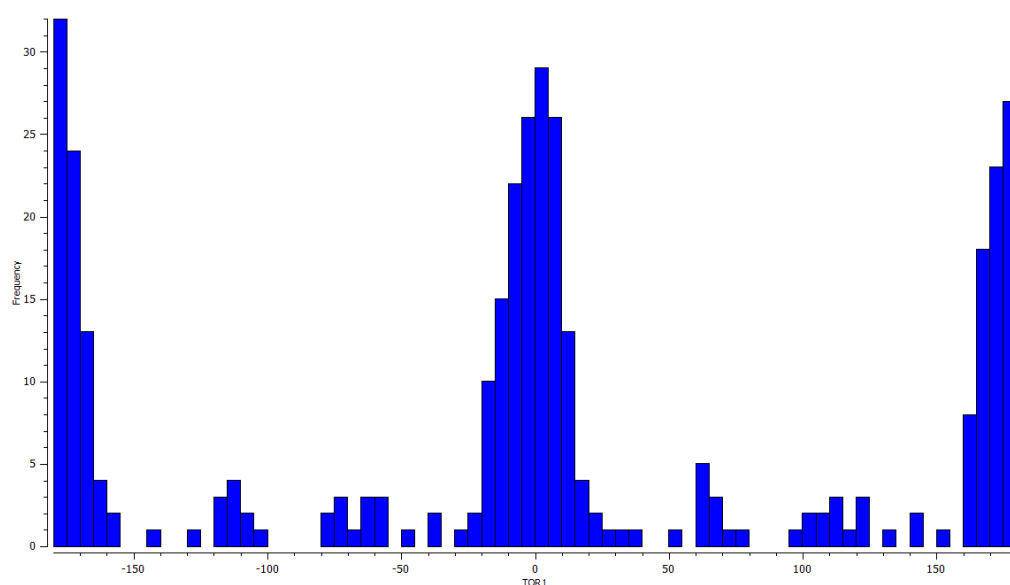

**Figure S2.** Distribution of torsion angle  $\tau_1$  from the retrieved CSD set (83 hits).

## S2. Simulated and measured PXRD patterns

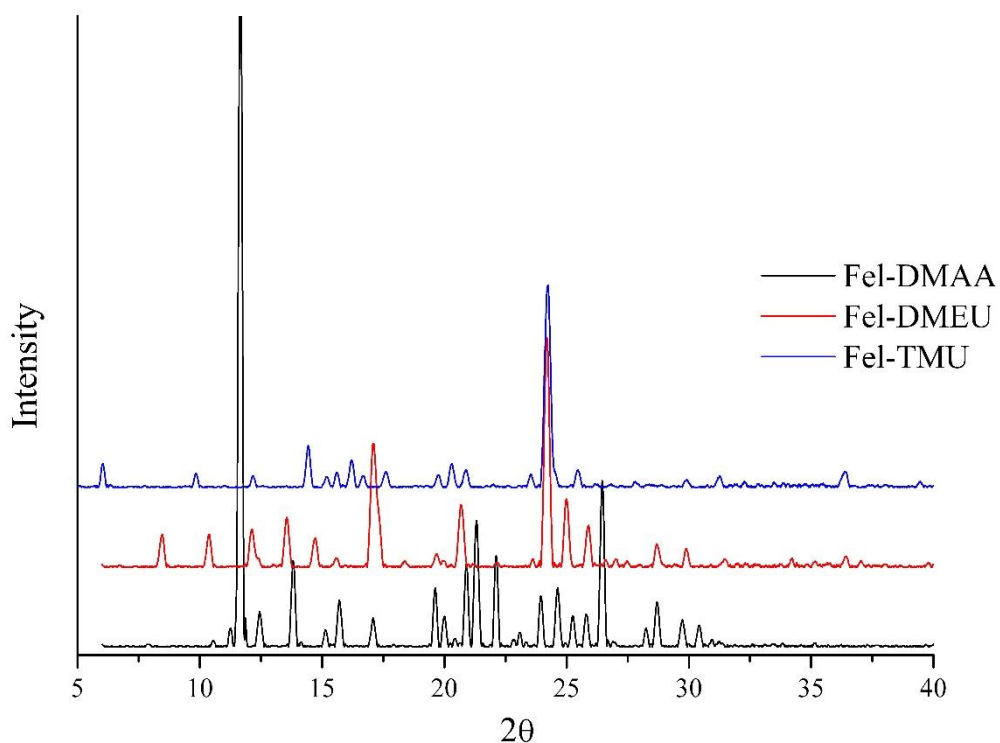

**Figure S3.** Measured PXRD patterns of the felodipine solvates

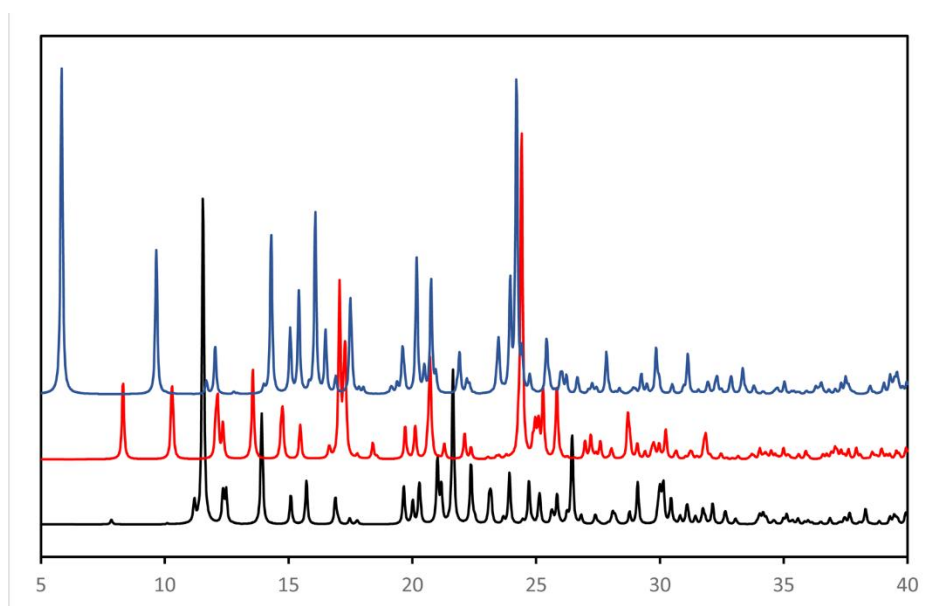

**Figure S4.** Simulated PXRD patterns of the felodipine solvates

The measured PXRD pattern of [Fel+TMU] appears to be subject to preferred orientation, enhancing intensity of the peak at  $2\theta \approx 24^\circ$ . The peak positions are otherwise well matched.

### S3 HSM pictures for [FeI+TMU] and [FeI+DMEU]

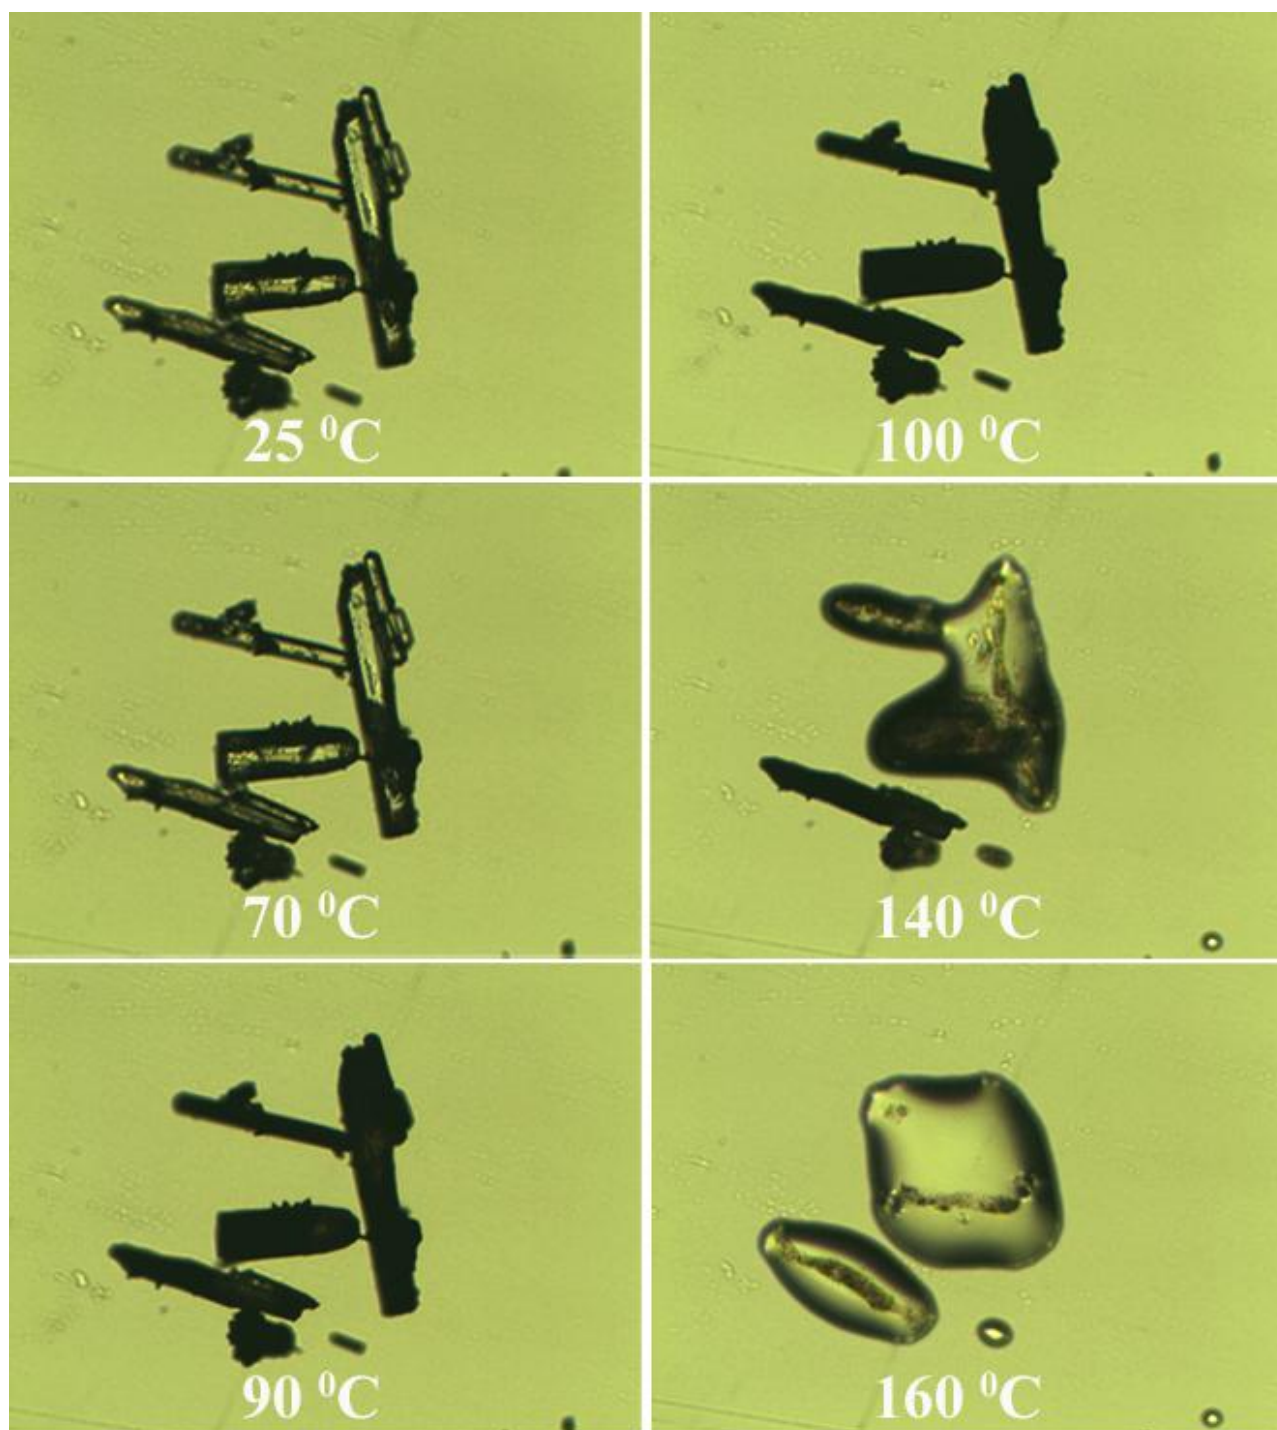

**Figure S5.** Photomicrographs of [FeI+TMU] showing thermal decomposition of the solvate and the subsequent dissolution process.

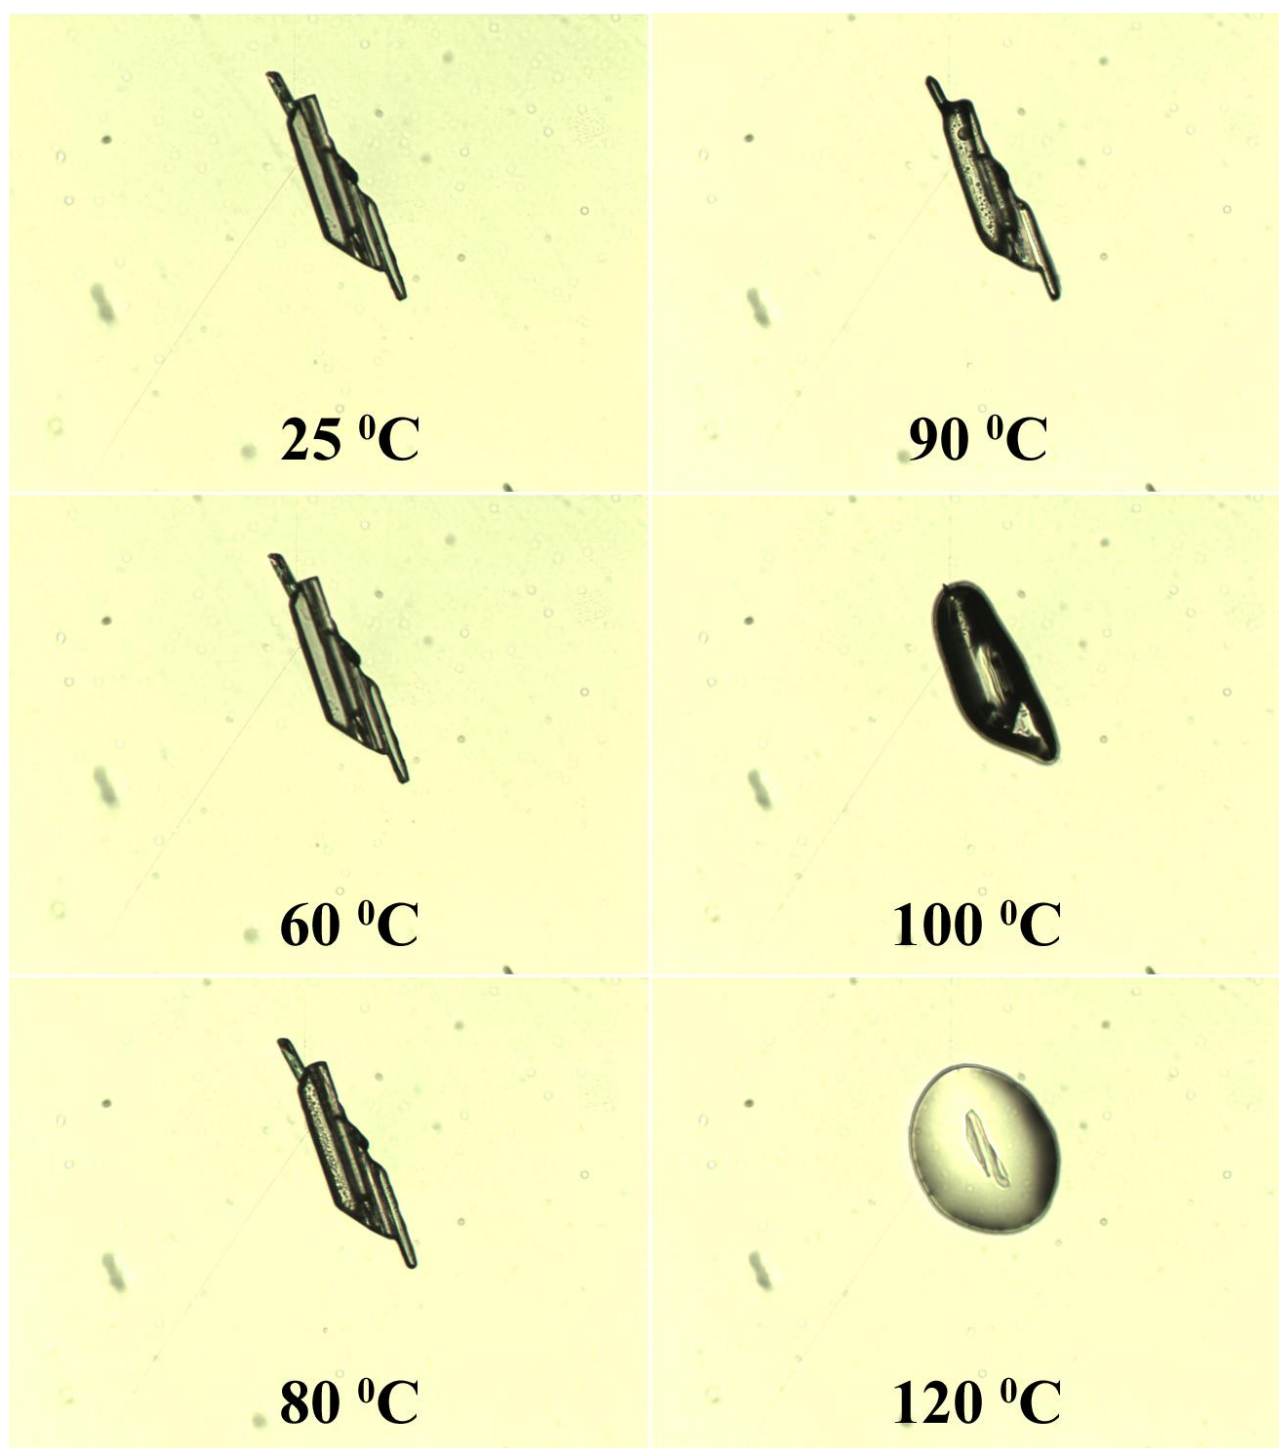

**Figure S6.** Photomicrographs of [FeI+DMEU] showing thermal decomposition of the solvate and the subsequent dissolution process.

## S4 TGA traces of the felodipine solvates

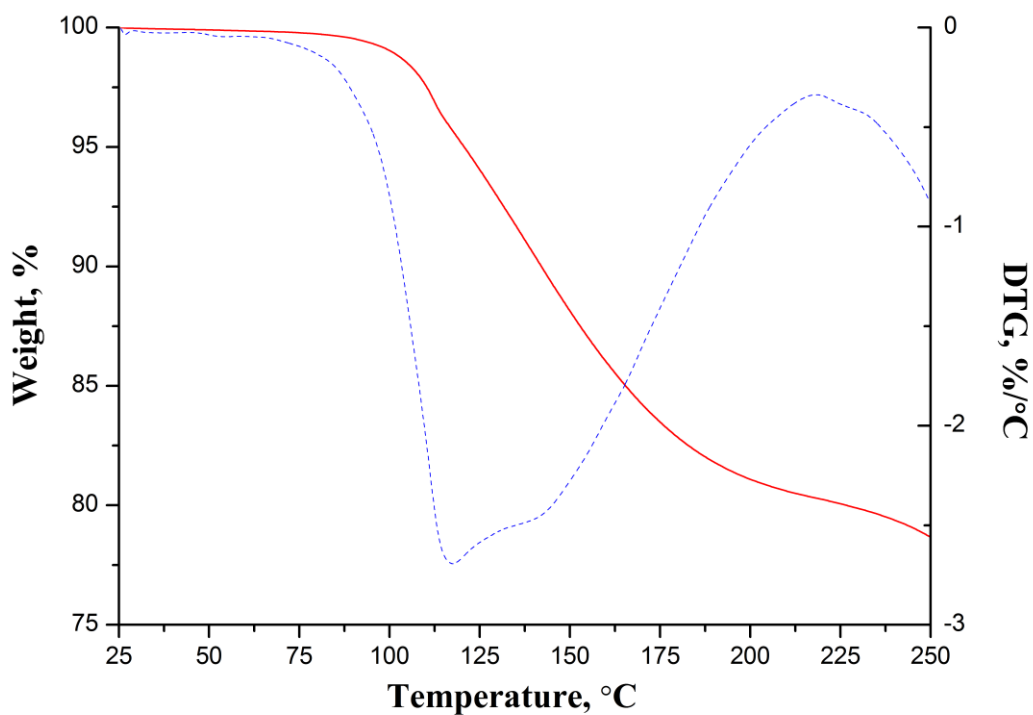

Figure S7. TGA trace of [Fel+DMAA] solvate

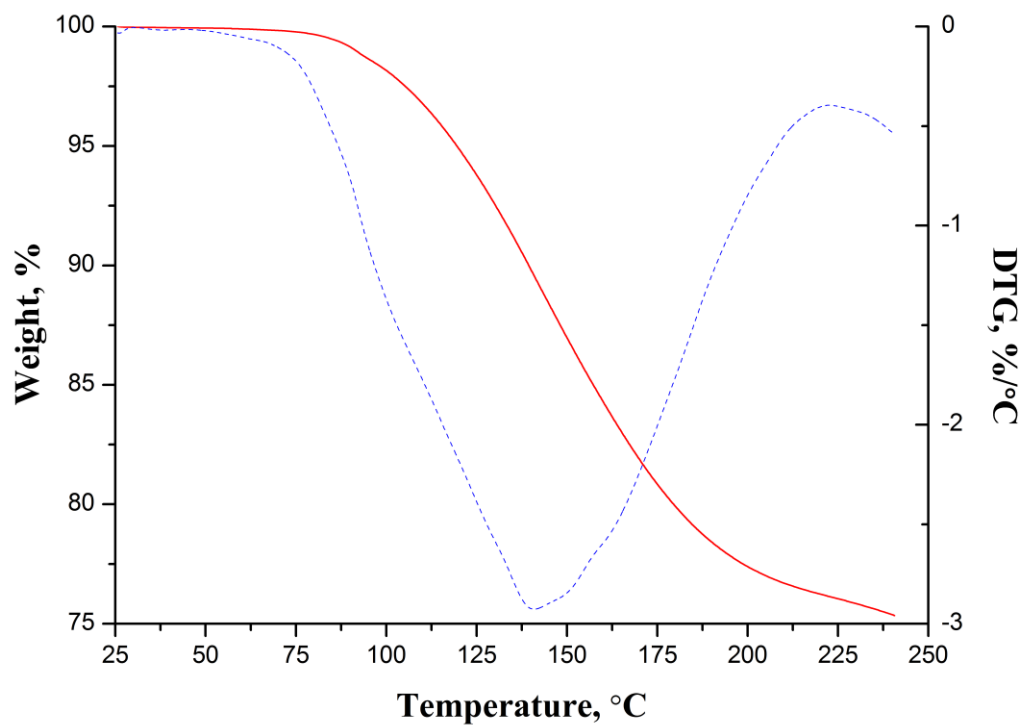

Figure S8. TGA trace of [Fel+TMU] solvate

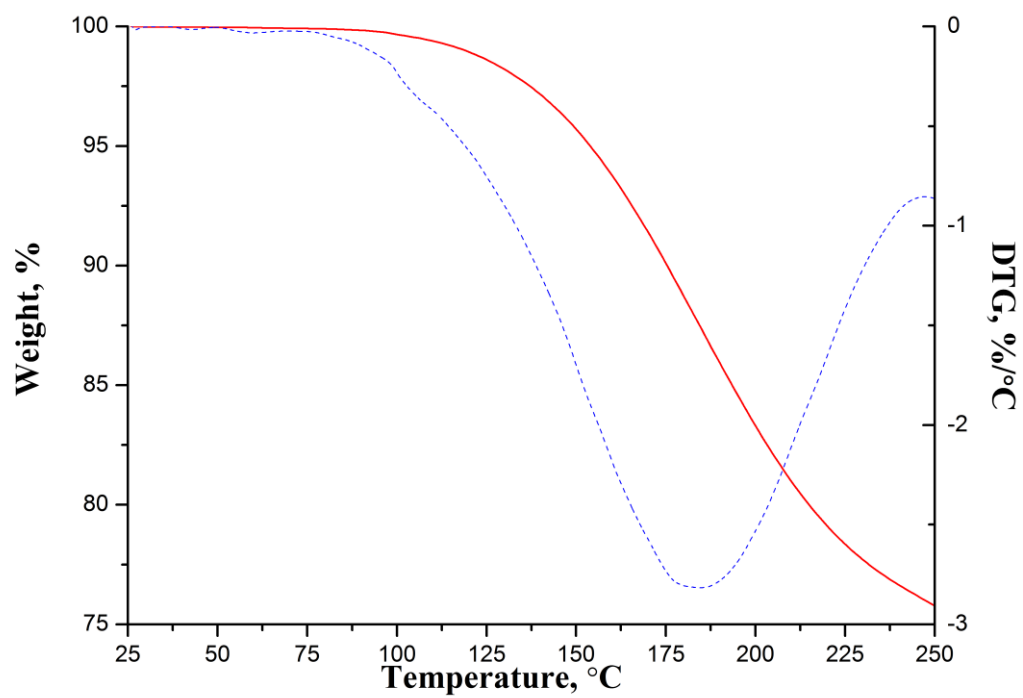

**Figure S9.** TGA trace of [FeI+DMEU] solvate

**Table S1.** The weight, g (mg), solution concentrations, m (mol kg<sup>-1</sup>), and solution enthalpies,  $\Delta H_{sol}^0$  (kJ·mol<sup>-1</sup>), of felodipine and its solvates in respective solvents at 298 K.

| Dimethylacetamide (DMAA)    |                    |                    |                          |                    |                    |
|-----------------------------|--------------------|--------------------|--------------------------|--------------------|--------------------|
| Felodipine                  |                    |                    | [Fel+DMAA]               |                    |                    |
| mg                          | m·10 <sup>-3</sup> | $\Delta H_{sol}^0$ | mg                       | m·10 <sup>-3</sup> | $\Delta H_{sol}^0$ |
| 12.5                        | 0.72               | 11.5               | 28.7                     | 1.38               | 29.2               |
| 48.9                        | 2.83               | 10.6               | 51.3                     | 2.46               | 29.8               |
| 17.1                        | 0.98               | 11.0               | 84.2                     | 4.04               | 31.0               |
| 34.5                        | 1.99               | 10.7               | 24.9                     | 1.17               | 29.2               |
|                             |                    |                    | 54.5                     | 2.56               | 29.7               |
| $\Delta H_{sol}^{m,298}$    |                    | =10.9±0.2          | $\Delta H_{sol}^{m,298}$ |                    | =29.8±0.3          |
| Dimethylethyleneurea (DMEU) |                    |                    |                          |                    |                    |
| Felodipine                  |                    |                    | [Fel+DMEU]               |                    |                    |
| mg                          | m·10 <sup>-3</sup> | $\Delta H_{sol}^0$ | mg                       | m·10 <sup>-3</sup> | $\Delta H_{sol}^0$ |
| 13.8                        | 0.72               | 7.9                | 26.9                     | 1.05               | 25.9               |
| 31.8                        | 1.65               | 7.4                | 64.9                     | 2.54               | 25.1               |
| 61.2                        | 3.17               | 7.2                | 36.3                     | 1.52               | 25.8               |
| 18.4                        | 0.98               | 6.9                | 76.0                     | 3.19               | 25.7               |
| 43.4                        | 2.33               | 7.1                | 84.8                     | 3.41               | 27.0               |
| $\Delta H_{sol}^{m,298}$    |                    | =7.3±0.2           | $\Delta H_{sol}^{m,298}$ |                    | =25.9±0.3          |
| Tetramethylurea (TMU)       |                    |                    |                          |                    |                    |
| Felodipine                  |                    |                    | [Fel+TMU]                |                    |                    |
| mg                          | m·10 <sup>-3</sup> | $\Delta H_{sol}^0$ | mg                       | m·10 <sup>-3</sup> | $\Delta H_{sol}^0$ |
| 11.8                        | 0.67               | 3.9                | 15.0                     | 0.67               | 22.1               |
| 27.7                        | 1.59               | 4.0                | 46.3                     | 2.06               | 23.6               |
| 47.4                        | 2.72               | 4.3                | 66.0                     | 2.93               | 23.4               |
| 22.9                        | 1.33               | 4.1                | 19.6                     | 0.88               | 23.8               |
| 45.9                        | 2.65               | 4.3                | 39.3                     | 1.77               | 22.7               |
|                             |                    |                    | 64.7                     | 2.91               | 22.4               |
| $\Delta H_{sol}^{m,298}$    |                    | =4.1±0.1           | $\Delta H_{sol}^{m,298}$ |                    | =23.0±0.3          |
